# Supplementary material for: DR5 Up-Regulation Induced by Dichloroacetate Sensitizes Tumor Cells to Lipid Nanoparticles Decorated with TRAIL
Source: MDPI journal article supplement (doi:10.3390/jcm12020608), 2023-01-12
Supplement: s1 [file s1]

SUPPLEMENTAL MATERIAL

DR5 up-regulation induced by dichloroacetate sensitizes tumor cells to lipid nanoparticles decorated with TRAIL

Joaquín Marco-Brualla, Diego de Miguel, Luis Martínez-Lostao & Alberto Anel

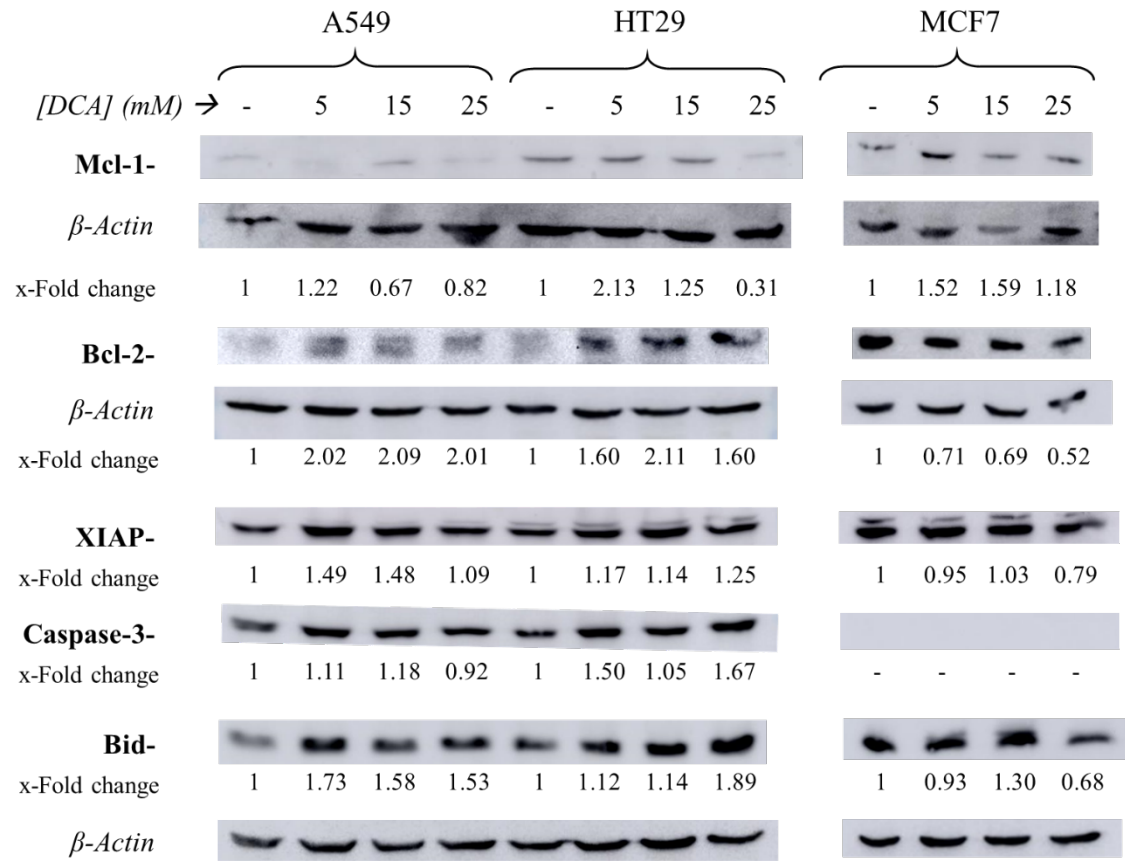

**Figure S1.** Expression of multiple pro- and anti-apoptotic proteins after DCA exposure. A549, HT29 and MCF7 cells were incubated for 72 h with DCA (25 mM) and then levels of Mcl-1, Bcl-2, Bid, XIAP and caspase-3 were measured by immunoblot.
